# Supplementary material for: Preparation and Characterization of Curcumin Nanoemulgel Utilizing Ultrasonication Technique for Wound Healing: In Vitro, Ex Vivo, and In Vivo Evaluation
Source: MDPI journal article supplement (doi:10.3390/gels7040213), 2021-11-14
Supplement: s1 [file s1]

Article

# Preparation and Characterization of Curcumin Nanoemulgel Utilizing Ultrasonication Technique for Wound Healing: In Vitro, Ex Vivo, and In Vivo Evaluation

Mohammed S. Algahtani <sup>1</sup>, Mohammad Zaki Ahmad <sup>1</sup>, Ihab Hamed Nourein <sup>2</sup>, Hassan A. Albarqi <sup>1</sup>, Hamad S. Alyami <sup>1</sup>, Mohammad H. Alyami <sup>1</sup>, Abdulsalam A. Alqahtani <sup>1</sup>, Ali Alasiri <sup>1</sup>, Thamer S. Algahtani, Abdul Aleem Mohammed <sup>1</sup> and Javed Ahmad <sup>1,\*</sup>

<sup>1</sup> Department of Pharmaceutics, College of Pharmacy, Najran University, Najran 11001, Saudi Arabia; msalqahtane@nu.edu.sa (M.S.A.); mzahmad@nu.edu.sa (M.Z.A.); haalbarqi@nu.edu.sa (H.A.A.); hsalmukalas@nu.edu.sa (H.S.A.); mhalmansour@nu.edu.sa (M.H.A.); aamari@nu.edu.sa (A.A.A.); aalasiri@nu.edu.sa (A.A.); Abdul Aleem Mohammed (A.A.M.)

<sup>2</sup> Department of Clinical Laboratory (Histopathology and Cytology), College of Applied Medical Sciences, Najran University, Najran 11001, Saudi Arabia; ihab213@gmail.com

\* Correspondence: jaahmed@nu.edu.sa; Tel.: +966-17542-8744

## Supplementary Materials

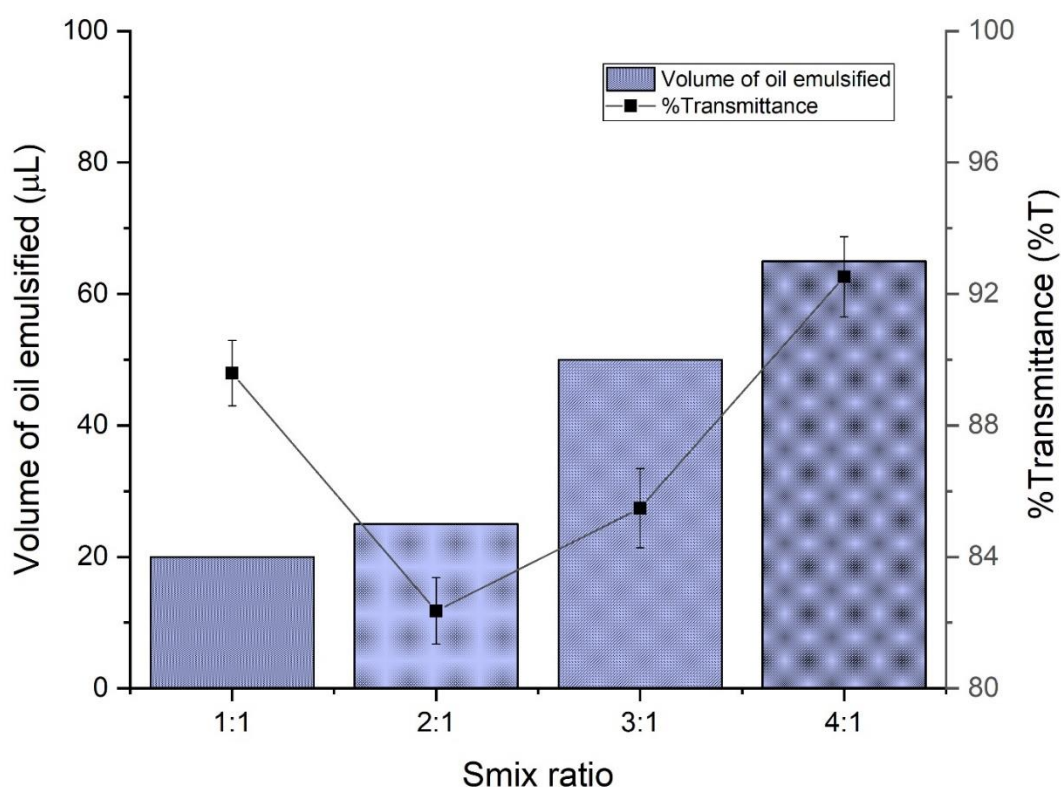

**Figure S1.** Volume of optimized oil phase (Labrafac PG) emulsified in Smix phase (Tween 80 and PEG 400) at different ratios (1:1, 2:1, 3:1, and 4:1) to measure its emulsification efficiency and corresponding value of the percentage transmittance.

## Results

|                                | Diam. (nm)           | % Intensity | Width (nm) |
|--------------------------------|----------------------|-------------|------------|
| <b>Z-Average (r.nm):</b> 56.64 | <b>Peak 1:</b> 60.77 | 100.0       | 16.77      |
| <b>Pdl:</b> 0.054              | <b>Peak 2:</b> 0.000 | 0.0         | 0.000      |
| <b>Intercept:</b> 0.934        | <b>Peak 3:</b> 0.000 | 0.0         | 0.000      |

Result quality : Good

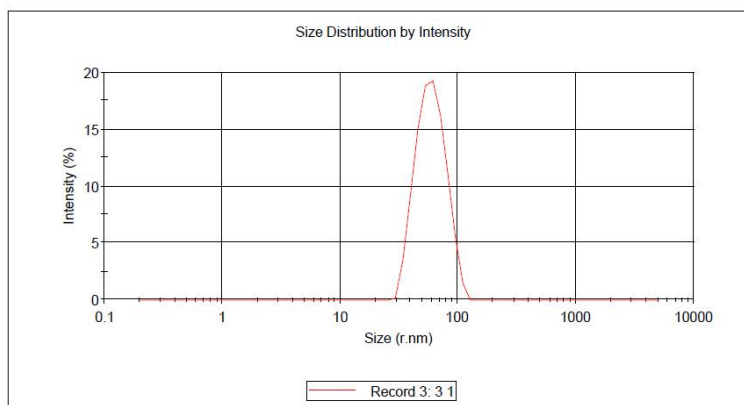

## Results

|                                      | Mean (mV)            | Area (%) | Width (mV) |
|--------------------------------------|----------------------|----------|------------|
| <b>Zeta Potential (mV):</b> -20.3    | <b>Peak 1:</b> -20.3 | 100.0    | 5.39       |
| <b>Zeta Deviation (mV):</b> 5.39     | <b>Peak 2:</b> 0.00  | 0.0      | 0.00       |
| <b>Conductivity (mS/cm):</b> 0.00570 | <b>Peak 3:</b> 0.00  | 0.0      | 0.00       |

Result quality : Good

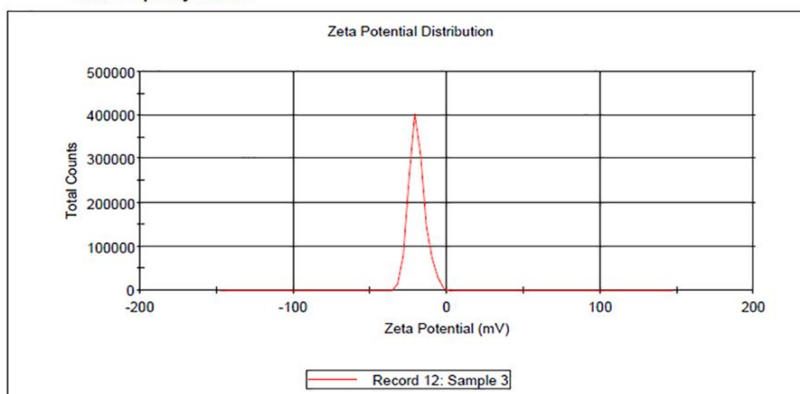

**Figure S2.** Droplet size (56.64 nm with PDI 0.054) and zeta potential (-20.3 mV) of NE6.

## Results

|                                | Diam. (nm)           | % Intensity | Width (nm) |
|--------------------------------|----------------------|-------------|------------|
| <b>Z-Average (r.nm):</b> 51.10 | <b>Peak 1:</b> 63.58 | 100.0       | 30.61      |
| <b>Pdl:</b> 0.181              | <b>Peak 2:</b> 0.000 | 0.0         | 0.000      |
| <b>Intercept:</b> 0.923        | <b>Peak 3:</b> 0.000 | 0.0         | 0.000      |
| <b>Result quality :</b> Good   |                      |             |            |

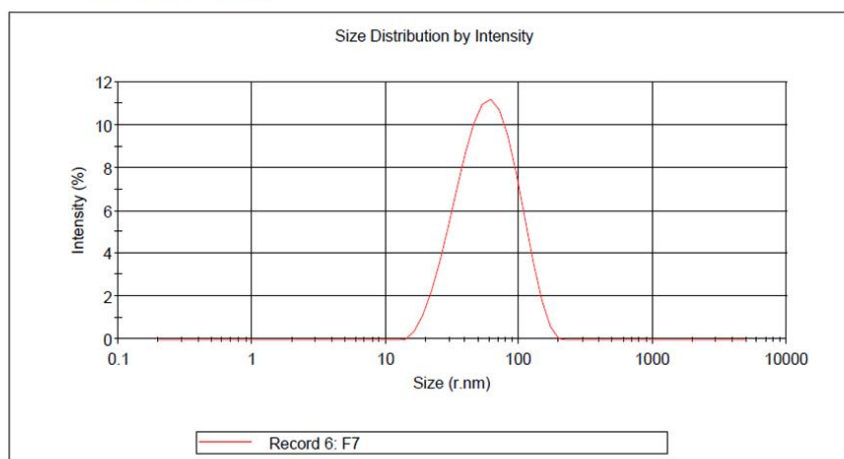

## Results

|                                      | Mean (mV)            | Area (%) | Width (mV) |
|--------------------------------------|----------------------|----------|------------|
| <b>Zeta Potential (mV):</b> -18.8    | <b>Peak 1:</b> -18.8 | 100.0    | 5.24       |
| <b>Zeta Deviation (mV):</b> 5.24     | <b>Peak 2:</b> 0.00  | 0.0      | 0.00       |
| <b>Conductivity (mS/cm):</b> 0.00584 | <b>Peak 3:</b> 0.00  | 0.0      | 0.00       |
| <b>Result quality :</b> Good         |                      |          |            |

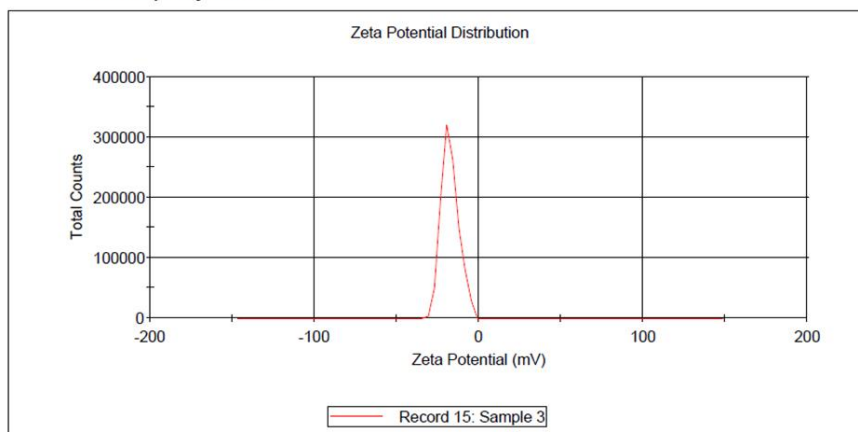

**Figure S3.** Droplet size (51.10 nm with PDI 0.181) and zeta potential (-18.8 mV) of NE7.

## Results

|                                | Diam. (nm)           | % Intensity | Width (nm) |
|--------------------------------|----------------------|-------------|------------|
| <b>Z-Average (r.nm):</b> 49.39 | <b>Peak 1:</b> 56.37 | 100.0       | 21.25      |
| <b>Pdl:</b> 0.113              | <b>Peak 2:</b> 0.000 | 0.0         | 0.000      |
| <b>Intercept:</b> 0.921        | <b>Peak 3:</b> 0.000 | 0.0         | 0.000      |
| <b>Result quality :</b> Good   |                      |             |            |

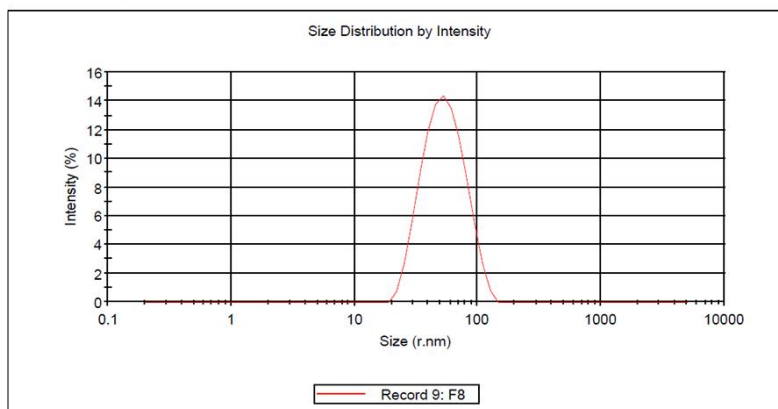

## Results

|                                     | Mean (mV)            | Area (%) | Width (mV) |
|-------------------------------------|----------------------|----------|------------|
| <b>Zeta Potential (mV):</b> -18.1   | <b>Peak 1:</b> -18.1 | 100.0    | 4.84       |
| <b>Zeta Deviation (mV):</b> 4.84    | <b>Peak 2:</b> 0.00  | 0.0      | 0.00       |
| <b>Conductivity (mS/cm):</b> 0.0101 | <b>Peak 3:</b> 0.00  | 0.0      | 0.00       |
| <b>Result quality :</b> Good        |                      |          |            |

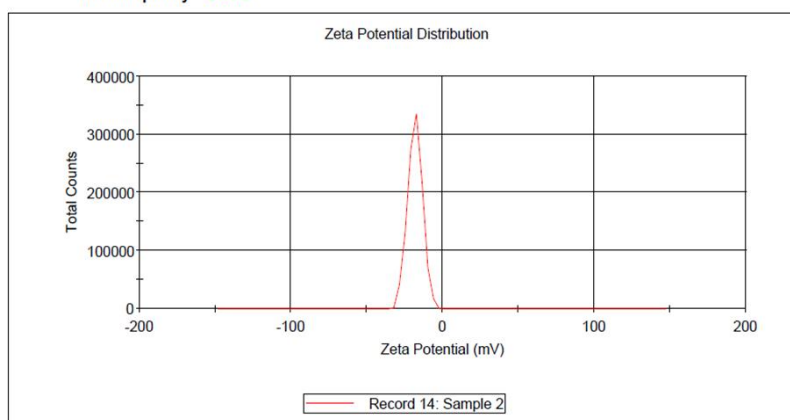

**Figure S4.** Droplet size (49.39 nm with PDI 0.113) and zeta potential (-18.1 mV) of NE8.

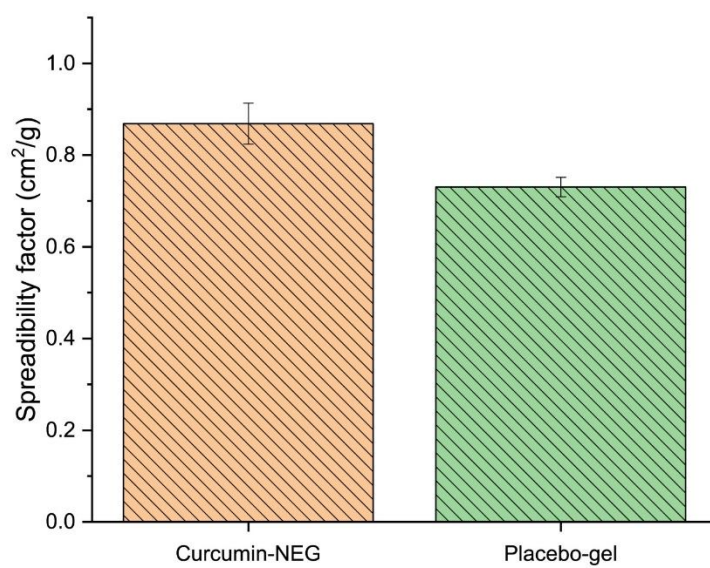

**Figure S5.** Spreadability behavior of curcumin NEG system and placebo gel system.
